# Supplementary material for: The emergence of a robust lithium gallium oxide surface layer on gallium-doped LiNiO2 cathodes enables extended cycling stability
Source: Royal Society of Chemistry journal article supplement (doi:10.1039/d3ma01102j), 2024-01-01
Supplement: d3ma01102j1.pdf [file d3ma01102j1.pdf]

Supplementary Information

## **The emergence of a robust lithium gallium oxide surface layer on gallium-doped LiNiO<sub>2</sub> cathodes enables extended cycling stability**

Mritunjay Mishra<sup>b</sup>, Koffi P.C. Yao<sup>a\*</sup>

<sup>a</sup>*Department of Mechanical Engineering, University of Delaware, Newark, Delaware 19716, United States of America.*

<sup>b</sup>*Department of Chemistry and Biochemistry, University of Delaware, Newark, Delaware 19716, United States of America.*

*Corresponding author email: [claver@udel.edu](mailto:claver@udel.edu)*

## Literature survey of doped LiNiO<sub>2</sub> cycling

**Table S1.** Data table used for obtaining Fig.1 in the manuscript.

| S.No. | Cathodes                                                                     | % retention   Cycle No. | Discharge Capacity (mAh·g <sup>-1</sup> ) | C-rate/Current density              | Ref.             |
|-------|------------------------------------------------------------------------------|-------------------------|-------------------------------------------|-------------------------------------|------------------|
| 1     | LiNiO <sub>2</sub>                                                           | 83 50                   | 247.5                                     | C/10<br>1C = 180 mA·g <sup>-1</sup> | 1                |
|       | 1%W-LiNiO <sub>2</sub>                                                       | 95 50                   | 242.7                                     |                                     |                  |
|       | 1.5%W-LiNiO <sub>2</sub>                                                     | 96 50                   | 236.1                                     |                                     |                  |
|       | 2%W-LiNiO <sub>2</sub>                                                       | 97 50                   | 225.9                                     |                                     |                  |
| 2     | LiNiO <sub>2</sub>                                                           | 79 50                   | 216                                       | C/10<br>1C = 200 mA·g <sup>-1</sup> | 2                |
|       | 0.2%Cu-LiNiO <sub>2</sub>                                                    | 90 50                   | 218                                       |                                     |                  |
| 3     | LiNiO <sub>2</sub>                                                           | 85 50                   | 250                                       | C/10<br>1C = 180 mA·g <sup>-1</sup> | 3                |
|       | 1.4%Zr-LiNiO <sub>2</sub>                                                    | 95 50                   | 232.6                                     |                                     |                  |
| 4     | LiNiO <sub>2</sub>                                                           | 57 50                   | 203.76                                    | C/10<br>1C = -                      | 4                |
|       | 1%Nb-LiNiO <sub>2</sub>                                                      | 81 50                   | 203.27                                    |                                     |                  |
|       | 1.5%Nb-LiNiO <sub>2</sub>                                                    | 85 50                   | 221.20                                    |                                     |                  |
|       | 2%Nb-LiNiO <sub>2</sub>                                                      | 70 50                   | 201.50                                    |                                     |                  |
| 5     | LiNiO <sub>2</sub>                                                           | 85 50                   | 247.5                                     | C/10<br>1C = 180 mA·g <sup>-1</sup> | 5                |
|       | 0.5% Zr-LiNiO <sub>2</sub>                                                   | 92 50                   | 246.5                                     |                                     |                  |
| 6     | LiNiO <sub>2</sub>                                                           | 88 50                   | 232.97                                    | C/10<br>1C = 180 mA·g <sup>-1</sup> | 6                |
|       | Mg-LiNiO <sub>2</sub>                                                        | 89 50                   | 235.45                                    |                                     |                  |
|       | MgCu-LiNiO <sub>2</sub>                                                      | 91 50                   | 229.49                                    |                                     |                  |
| 7     | LiNiO <sub>2</sub>                                                           | 71 50                   | 215.9                                     | C/10<br>1C = 270 mA·g <sup>-1</sup> | 7                |
|       | 1%Nb-LiNiO <sub>2</sub>                                                      | 92 50                   | 188.1                                     |                                     |                  |
| 8     | LiNiO <sub>2</sub>                                                           | 77 50                   | 161.8                                     | C/10<br>1C = -                      | 8                |
|       | LiNi <sub>0.975</sub> Ga <sub>0.025</sub> O <sub>2</sub>                     | 45 50                   | 174.4                                     |                                     |                  |
|       | LiNi <sub>0.975</sub> Al <sub>0.025</sub> O <sub>2</sub>                     | 46 50                   | 170.5                                     |                                     |                  |
|       | LiNi <sub>0.995</sub> Ti <sub>0.005</sub> O <sub>2</sub>                     | 41 50                   | 172.9                                     |                                     |                  |
|       | LiNi <sub>0.990</sub> Al <sub>0.005</sub> Ti <sub>0.005</sub> O <sub>2</sub> | 47 50                   | 196.3                                     |                                     |                  |
| 9     | LiNiO <sub>2</sub>                                                           | 20 50                   | 200                                       | C/10<br>1C = 180 mA·g <sup>-1</sup> | 9                |
|       | ZrO <sub>2</sub> -LiNiO <sub>2</sub>                                         | 92 50                   | 190                                       |                                     |                  |
| 10    | LiNiO <sub>2</sub>                                                           | 76 50                   | 210.3                                     | C/10<br>1C = 180 mA·g <sup>-1</sup> | 10               |
|       | C <sub>6</sub> H <sub>6</sub> CoO <sub>4</sub> -LiNiO <sub>2</sub>           | 87 50                   | 214.7                                     |                                     |                  |
| 11    | LiNiO <sub>2</sub>                                                           | 51 50                   | 210                                       | 36 mA·g <sup>-1</sup>               | 11               |
|       | 2% Ga-LiNiO <sub>2</sub>                                                     | 100 50                  | 190                                       |                                     |                  |
|       | 0.5% Ga-LiNiO <sub>2</sub>                                                   | 83 50                   | 180                                       |                                     |                  |
| 12    | LiNiO <sub>2</sub>                                                           | 57 50                   | 230                                       | C/10<br>1C = 225 mA·g <sup>-1</sup> | 12               |
|       | 1%Ga-LiNiO <sub>2</sub>                                                      | 60 50                   | 225                                       |                                     |                  |
|       | 2%Ga-LiNiO <sub>2</sub>                                                      | 80 50                   | 225                                       |                                     |                  |
|       | 3%Ga-LiNiO <sub>2</sub>                                                      | 80 50                   | 220                                       |                                     |                  |
|       | 4%Ga-LiNiO <sub>2</sub>                                                      | 84 50                   | 205                                       |                                     |                  |
|       | 5%Ga-LiNiO <sub>2</sub>                                                      | 83 50                   | 190                                       |                                     |                  |
| 13    | LiNiO <sub>2</sub>                                                           | 88 50                   | 209                                       | C/10<br>1C = 200 mA·g <sup>-1</sup> | 13               |
|       | 2% Al-LiNiO <sub>2</sub>                                                     | 89 50                   | 221                                       |                                     |                  |
|       | 4% Al-LiNiO <sub>2</sub>                                                     | 88 50                   | 185                                       |                                     |                  |
|       | 6% Al-LiNiO <sub>2</sub>                                                     | 85 50                   | 181                                       |                                     |                  |
| 14    | LiNiO <sub>2</sub>                                                           | 52 50                   | 240                                       | C/10<br>1C = 200 mA·g <sup>-1</sup> | 14               |
| 15    | LiNiO <sub>2</sub>                                                           | 66 50                   | 235.9                                     | C/10<br>1C = 200 mA·g <sup>-1</sup> | 15               |
|       | 3%Al-LiNiO <sub>2</sub>                                                      | 85 50                   | 220.2                                     |                                     |                  |
|       | 5%Al-LiNiO <sub>2</sub>                                                      | 97 50                   | 209.9                                     |                                     |                  |
| 16    | LiNiO <sub>2</sub>                                                           | 67 50                   | 160                                       | C/3<br>0.4 mA·cm <sup>-2</sup>      | 16               |
|       | 1%Al-LiNiO <sub>2</sub>                                                      | 90 50                   | 149                                       |                                     |                  |
|       | 3%Al-LiNiO <sub>2</sub>                                                      | 100 50                  | 136                                       |                                     |                  |
| 17    | 0% Ga-LiNiO <sub>2</sub>                                                     | 45 50                   | 197                                       | C/10<br>1C = 180 mA·g <sup>-1</sup> | <b>This Work</b> |
|       | 2% Ga-LiNiO <sub>2</sub>                                                     | 50 50                   | 192                                       |                                     |                  |
|       | 5% Ga-LiNiO <sub>2</sub>                                                     | 84 50                   | 174                                       |                                     |                  |

**Table S2.** Variance of the capacity retention value obtained from publications shown in **Fig. 1** in introduction.

| Dopants in LiNiO <sub>2</sub> | Variance ( $\sigma^2$ ) | Standard deviation ( $\sigma$ ) |
|-------------------------------|-------------------------|---------------------------------|
| Undoped                       | 387                     | 19.67                           |
| Gallium                       | 283                     | 16.82                           |
| Tungsten                      | 5                       | 2.24                            |
| Zirconium                     | 76                      | 8.72                            |
| Niobium                       | 85                      | 9.22                            |
| Aluminium                     | 277                     | 16.64                           |

### Energy Dispersive X-Ray Spectroscopy (EDS) measurements and analyses

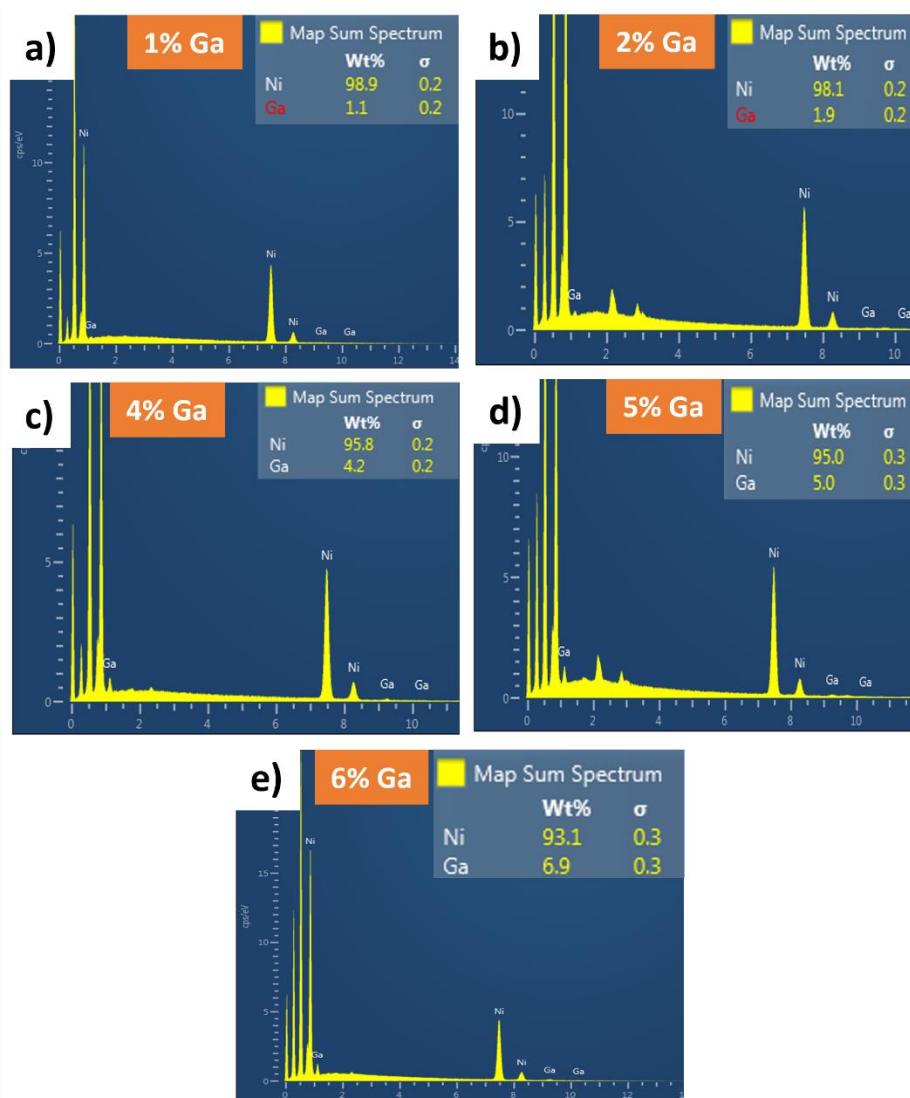

**Fig. S1.** (a-e) EDS spectrum of 0%-6% Ga-LiNiO<sub>2</sub> showing elemental composition obtained from one of the locations shown in **Table S3**.

**Table S3.** EDS data obtained from three distinct sites of 1% to 6% Ga-LiNiO<sub>2</sub>.

| S.No. | Compounds                      | Wt(%) from EDS<br>Ga : Ni | Mole(%) from EDS<br>Ga : Ni | Targeted Mole (%) Ga : Ni |
|-------|--------------------------------|---------------------------|-----------------------------|---------------------------|
| 1     | <b>1% Ga-LiNiO<sub>2</sub></b> |                           |                             | 1 : 99                    |
|       | Location 1                     | 1.1 : 98.9                | 1.0 : 99.0                  |                           |
|       | Location 2                     | 1.3 : 98.7                | 1.1 : 98.9                  |                           |
|       | Location 3                     | 1.4 : 98.6                | 1.2 : 98.8                  |                           |
|       | Average                        |                           | 1.1 : 98.9                  |                           |
| 2     | <b>2% Ga-LiNiO<sub>2</sub></b> |                           |                             | 2 : 98                    |
|       | Location 1                     | 2.4 : 97.6                | 2.03 : 97.97                |                           |
|       | Location 2                     | 2 : 98                    | 1.69 : 98.31                |                           |
|       | Location 3                     | 1.9 : 98.1                | 1.61 : 98.39                |                           |
|       | Average                        |                           | 1.77 : 98.23                |                           |
| 3     | <b>4% Ga-LiNiO<sub>2</sub></b> |                           |                             | 4 : 96                    |
|       | Location 1                     | 3.9 : 96.1                | 2.64 : 97.36                |                           |
|       | Location 2                     | 4.2 : 95.8                | 3.60 : 96.40                |                           |
|       | Location 3                     | 5 : 95                    | 4.24 : 95.76                |                           |
|       | Average                        |                           | 3.50 : 96.50                |                           |
| 4     | <b>5% Ga-LiNiO<sub>2</sub></b> |                           |                             | 5 : 95                    |
|       | Location 1                     | 5.6 : 94.4                | 4.76 : 95.24                |                           |
|       | Location 2                     | 5 : 95                    | 4.24 : 95.76                |                           |
|       | Location 3                     | 5.7 : 94.3                | 4.84 : 95.16                |                           |
|       | Average                        |                           | 4.61 : 95.39                |                           |
| 5     | <b>6% Ga-LiNiO<sub>2</sub></b> |                           |                             | 6 : 94                    |
|       | Location 1                     | 6.1 : 93.9                | 5.18 : 94.82                |                           |
|       | Location 2                     | 6.9 : 93.1                | 5.80 : 94.20                |                           |
|       | Location 3                     | 7.1 : 92.9                | 6.04 : 93.96                |                           |
|       | Average                        |                           | 5.67 : 94.33                |                           |

## X-ray Photoelectron Spectra (XPS) of 0%, 2%, and 5% Ga-LiNiO<sub>2</sub>

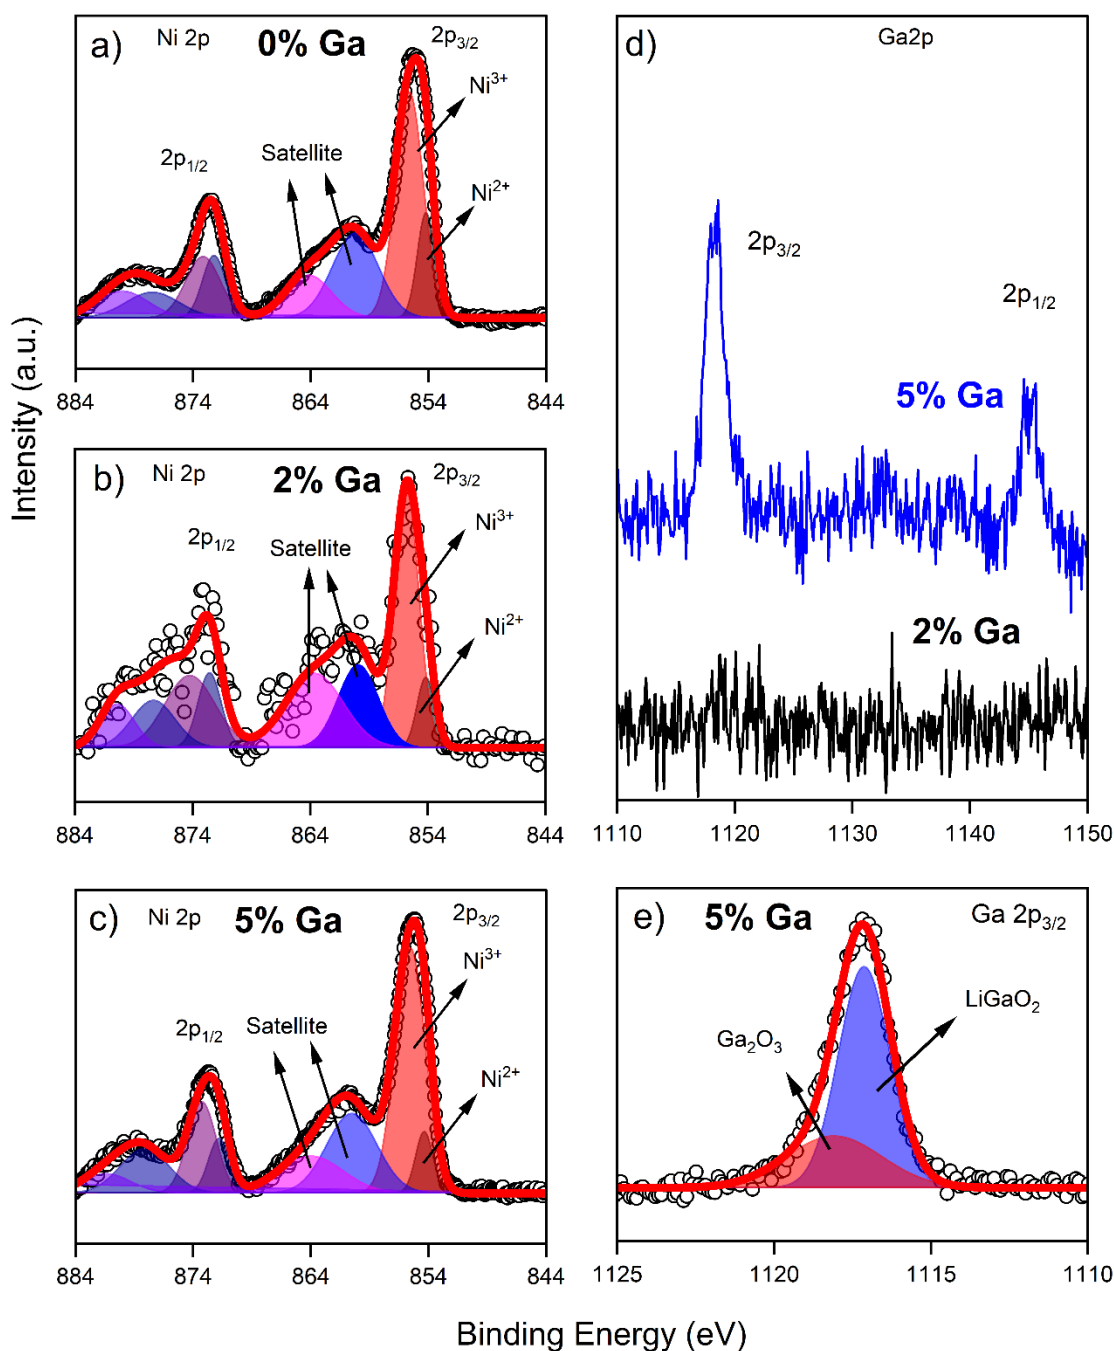

**Fig. S2.** Ni2p XPS of a) 0% Ga, b) 2% Ga, and c) 5% Ga-LiNiO<sub>2</sub>. d) Ga2p XPS of 2% and 5%Ga-LiNiO<sub>2</sub>. e) XPS spectra of Ga2p<sub>3/2</sub> of 5% Ga-LiNiO<sub>2</sub>.

XPS measurements were conducted on undoped and Ga-doped LiNiO<sub>2</sub> as shown in Fig. S2a-c. 2p orbital of Ni in 0%, 2%, and 5% Ga-LiNiO<sub>2</sub> yield a doublet (i.e., 2p<sub>3/2</sub> and 2p<sub>1/2</sub>) due to the spin-orbit coupling with the two possible states having different binding energies. Each energy state consists of Ni<sup>3+</sup> and Ni<sup>2+</sup> species along with their satellite peaks. The obtained XPS spectra were deconvoluted based on the previously reported XPS for nickel-rich oxide (NMC) cathodes.<sup>17,18</sup> The deconvoluted XPS spectra

confirmed the presence of  $\text{Ni}^{3+}$  and  $\text{Ni}^{2+}$  in all three  $\text{LiNiO}_2$  cathodes and their peak positions and area are tabulated in **Table S4**. In agreement with the observations of Wu et al.<sup>19</sup> on  $\text{LiNi}_{0.8}\text{Co}_{0.1}\text{Mn}_{0.1-x}\text{Ga}_x\text{O}_2$ , a systematic increase in the  $\text{Ni}^{3+}/\text{Ni}^{2+}$  ratio upon higher Ga doping is found, pointing to decreasing cation mixing.

The Ga 2p XPS spectra shown in **Fig. S2d** were acquired to characterize the surface phases present on 2% and 5% Ga doped  $\text{LiNiO}_2$ . No Ga signals were observed on the surface of 2% Ga due to bulk doping, however, intense Ga 2p peaks were seen for 5% Ga. To confirm the emergence of the  $\text{LiGaO}_2$  phase on the surface of 5% Ga- $\text{LiNiO}_2$ , XPS spectra were deconvoluted and shown in **Fig. S2e**. Deconvolution of the XPS spectra revealed two discernible peaks centered at 1117.13 eV and 1118.09 eV, respectively. The predominant peak observed at a lower binding energy of 1117.13 eV is attributed to the  $\text{LiGaO}_2$  phase.<sup>20</sup> The minor peak appearing at a relatively higher binding energy of 1118.09 eV is associated with the  $\text{Ga}_2\text{O}_3$  phase.<sup>20,21</sup> This observation corroborates the dominance of the  $\text{LiGaO}_2$  phase as a prominent constituent at the surface of the 5% Ga- $\text{LiNiO}_2$  material, as confirmed by the XRD, EDS and HRTEM analysis.

**Table S4.** Peak position and area ratio from XPS spectra deconvolution of 0%, 2%, and 5% Ga- $\text{LiNiO}_2$ .

|                         | $\text{Ni}^{2+}$   |          | $\text{Ni}^{3+}$   |          | Area Ratio<br>( $\text{Ni}^{3+}/\text{Ni}^{2+}$ ) |
|-------------------------|--------------------|----------|--------------------|----------|---------------------------------------------------|
|                         | Peak Position (eV) | Area (%) | Peak Position (eV) | Area (%) |                                                   |
| 0% Ga- $\text{LiNiO}_2$ | 854.20             | 22.80    | 855.61             | 77.20    | 3.38                                              |
| 2% Ga- $\text{LiNiO}_2$ | 854.17             | 19.36    | 855.79             | 80.64    | 4.16                                              |
| 5% Ga- $\text{LiNiO}_2$ | 854.35             | 12.57    | 855.54             | 87.43    | 6.95                                              |

### X-ray diffraction (XRD) patterns of as-synthesized 0%, 1%, 2%, 4%, 5% and 6% Ga doped $\text{LiNiO}_2$

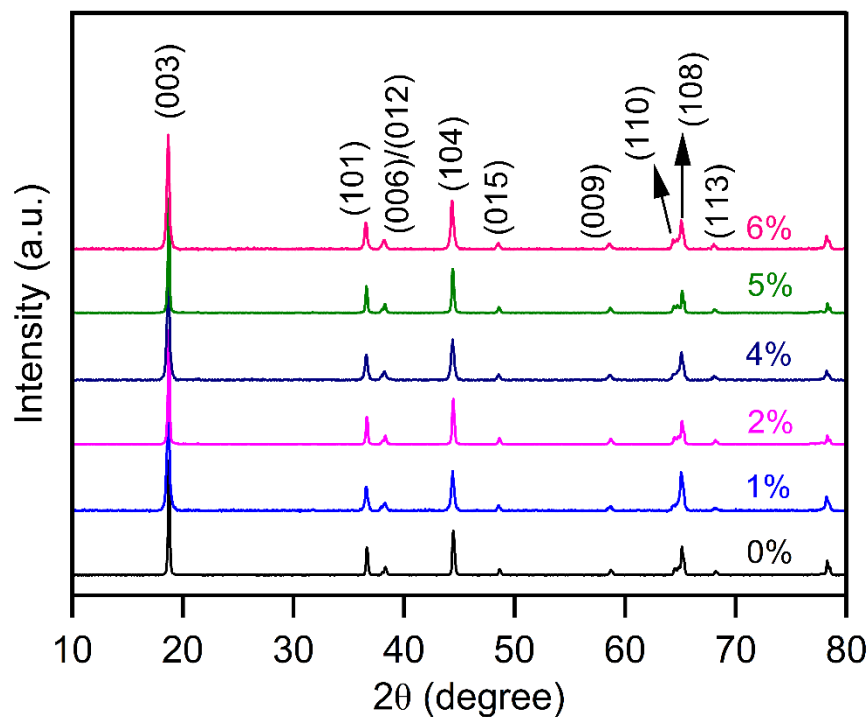

**Fig. S3.** XRD pattern of 0%-6% Ga-doped  $\text{LiNiO}_2$  pristine powder electrodes.

**Close inspection of the X-ray diffraction (XRD) patterns of as-synthesized undoped and Ga doped LiNiO<sub>2</sub>**

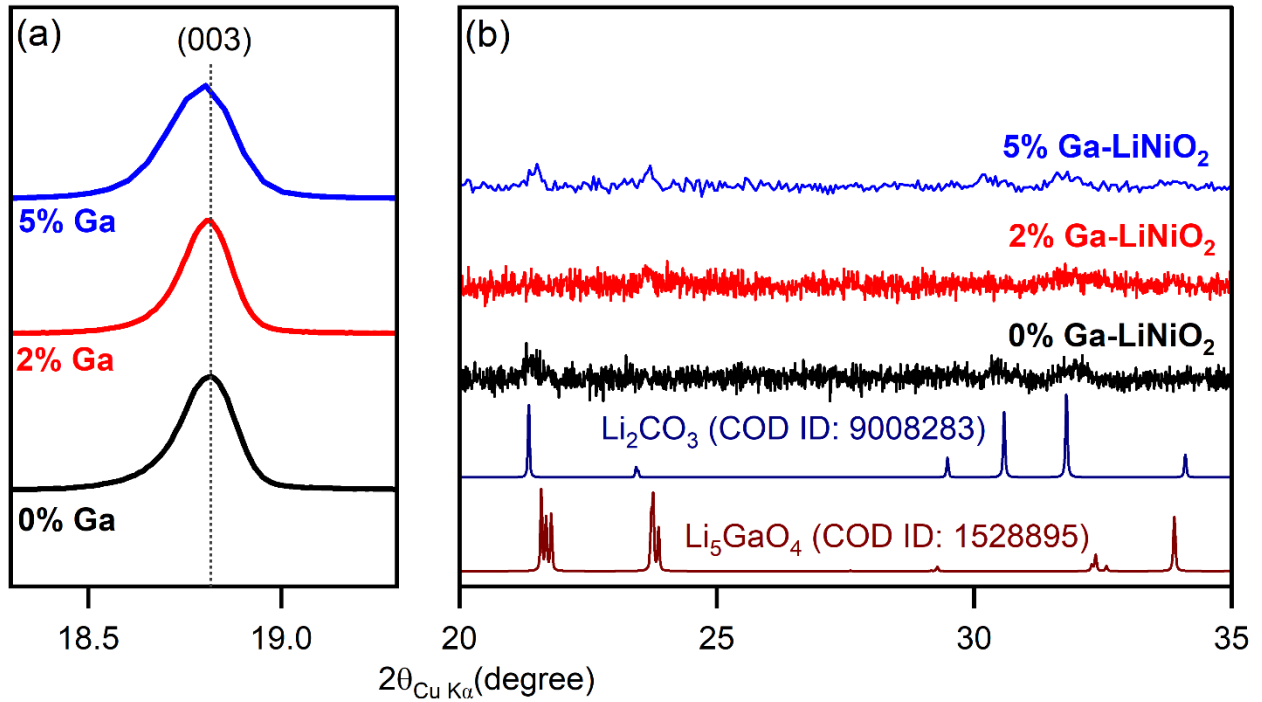

**Fig. S4.** (a) Magnified XRD at the (003) plane peak of 0%, 2%, and 5% Ga-LiNiO<sub>2</sub> showing shift and broadening of the plane with increasing Ga content. (b) Magnification of the 20°-35° range for comparison against Li<sub>2</sub>CO<sub>3</sub> and Li<sub>5</sub>GaO<sub>4</sub> reference PDFs .

**Table S5.** 2θ and FWHM value of (003) reflection corresponding to 0%, 2%, and 5% Gallium doped LiNiO<sub>2</sub>.

|                          | 2θ of (003)      | FWHM              |
|--------------------------|------------------|-------------------|
| 0% Ga-LiNiO <sub>2</sub> | 18.8060 ± 0.0016 | 0.16844 ± 0.00383 |
| 2% Ga-LiNiO <sub>2</sub> | 18.8027 ± 0.0016 | 0.15270 ± 0.00359 |
| 5% Ga-LiNiO <sub>2</sub> | 18.7888 ± 0.0043 | 0.20316 ± 0.01041 |

## Rietveld refinement analysis of 0%, 2% and 5% Ga-doped LiNiO<sub>2</sub>

In the structural model, we performed refinement on several key parameters, including the unit cell parameters, site occupancy, oxygen z-coordinate, and the isotropy  $U_{\text{iso}}$  parameters for oxygen (O), lithium (Li), gallium (Ga), and nickel (Ni) atoms. The following constraints were used:

- Similar  $U_{\text{iso}}$  parameters for atoms occupying the same Wyckoff site.
- The total occupancy of the 3a and 3b sites in a given  $R\bar{3}m$  phase adds to 1.
- The Ga content must be reasonably near the values targeted and measured by Energy dispersive X-ray spectroscopy (EDS).

It should be noted that Ga was investigated at several sites (i.e., 3a, 3a+3b, and 3b) and the best convergence was selected. At convergence, Ga appears to prefer the 3a sites within LiNiO<sub>2</sub>. Similar observations were made by Kitsche et al.<sup>12</sup> The possibility of Ga occupying Ni site has not been excluded, however.

Crystallographic coordinates corresponding to Wyckoff sites are as follows:

3a: (0, 0, 0), (1/3, 2/3, 2/3), (2/3, 1/3, 1/3)

3b: (0, 0, 1/2), (1/3, 2/3, 1/6), (2/3, 1/3, 5/6)

6c: (0, 0, ±z), (1/3, 2/3, 2/3±z), (2/3, 1/3, 1/3±z)



**Table S6.** Refined parameters of pristine LiNiO<sub>2</sub>.

| <b>LiNiO<sub>2</sub></b> |       |       |       |              |           |                  |
|--------------------------|-------|-------|-------|--------------|-----------|------------------|
|                          | x     | y     | z     | Wyckoff site | Occupancy | U <sub>iso</sub> |
| Li                       | 0.000 | 0.000 | 0.000 | 3a           | 0.964     | 0.07034          |
| Ni                       | 0.000 | 0.000 | 0.000 | 3a           | 0.036     | 0.07034          |
| Li                       | 0.000 | 0.000 | 0.500 | 3b           | 0.036     | 0.04030          |
| Ni                       | 0.000 | 0.000 | 0.500 | 3b           | 0.964     | 0.04030          |
| O                        | 0.000 | 0.000 | 0.242 | 6c           | 1         | 0.05273          |

R<sub>wp</sub> = 7.4%; R<sub>p</sub> = 5.32%; cation mixing = 3.6%

**Table S7.** Refined parameters of 2% Ga doped LiNiO<sub>2</sub>.

| <b>2% Ga doped LiNiO<sub>2</sub></b> |       |       |       |              |           |                  |
|--------------------------------------|-------|-------|-------|--------------|-----------|------------------|
|                                      | x     | y     | z     | Wyckoff site | Occupancy | U <sub>iso</sub> |
| Li                                   | 0.000 | 0.000 | 0.000 | 3a           | 0.983     | 0.00997          |
| Ga                                   | 0.000 | 0.000 | 0.000 | 3a           | 0.017     | 0.00997          |
| Ga                                   | 0.000 | 0.000 | 0.500 | 3b           | 0.001     | 0.01505          |
| Ni                                   | 0.000 | 0.000 | 0.500 | 3b           | 0.999     | 0.01505          |
| O                                    | 0.000 | 0.000 | 0.239 | 6c           | 1         | 0.01771          |

R<sub>wp</sub> = 7.12%; R<sub>p</sub> = 5.57%

**Table S8.** Refined parameters of 5% Ga doped LiNiO<sub>2</sub>.

| <b>5% Ga doped LiNiO<sub>2</sub></b>       |       |       |       |              |           |                  |
|--------------------------------------------|-------|-------|-------|--------------|-----------|------------------|
| <b>Phase 1: Ga-doped LiNiO<sub>2</sub></b> |       |       |       |              |           |                  |
|                                            | x     | y     | z     | Wyckoff site | Occupancy | U <sub>iso</sub> |
| Li                                         | 0.000 | 0.000 | 0.000 | 3a           | 0.984     | 0.03070          |
| Ga                                         | 0.000 | 0.000 | 0.000 | 3a           | 0.016     | 0.03070          |
| Ga                                         | 0.000 | 0.000 | 0.500 | 3b           | 0.004     | 0.03985          |
| Ni                                         | 0.000 | 0.000 | 0.500 | 3b           | 0.989     | 0.03985          |
| O                                          | 0.000 | 0.000 | 0.239 | 6c           | 1         | 0.04885          |
| <b>Phase 2: LiGaO<sub>2</sub></b>          |       |       |       |              |           |                  |
| Ga                                         | 0.000 | 0.000 | 0.500 | 3b           | 1         | 0.01689          |
| Li                                         | 0.000 | 0.000 | 0.000 | 3a           | 1         | 0.04909          |
| O                                          | 0.000 | 0.000 | 0.241 | 6c           | 1         | 0.21350          |

R<sub>wp</sub> = 8.47%; R<sub>p</sub> = 5.86%

## EDS line scan simulation assuming a core-shell particle configuration

The pseudocode for computing signal expectation based on a core-shell particle model is shown below. The beam penetration at position  $x$  in the Ga-rich and Ni-rich domains is a proxy for the signal strength from each element.

**Function** `EDS_signal_estimate( $R_o$ ,  $R_i$ ,  $NominalPenetration$ ,  $x$ )`:

```

# x is referenced from the particle center (0, 0)
if  $R_o < R_i$ : raise Exception

OuterSliceDepth =  $2 * (R_o^2 - x^2)^{1/2}$  if ( $R_o > |x|$ ) else 0
InnerSliceDepth =  $2 * (R_i^2 - x^2)^{1/2}$  if ( $R_i > |x|$ ) else 0
ProbeLength = min( $NominalPenetration$ ,  $OuterSliceDepth$ )
ShellLength = ( $OuterSliceDepth - InnerSliceDepth$ )/2
SurfaceToFarCoreLength =  $ShellLength + InnerSliceDepth$ 
# Signals calculation
if  $InnerSliceDepth \neq 0$ :
    if  $ProbeLength < SurfaceToFarCoreLength$ :
        Ga = min( $ProbeLength$ ,  $ShellLength$ )
        Ni = max[( $ProbeLength - Ga$ ), 0]
    else:
        Ga =  $ProbeLength - InnerSliceDepth$ 
        Ni =  $ProbeLength - Ga$ 
else:
    Ga =  $ProbeLength$ 
    Ni = 0

```

**Return** ( $Ga$ ,  $Ni$ )

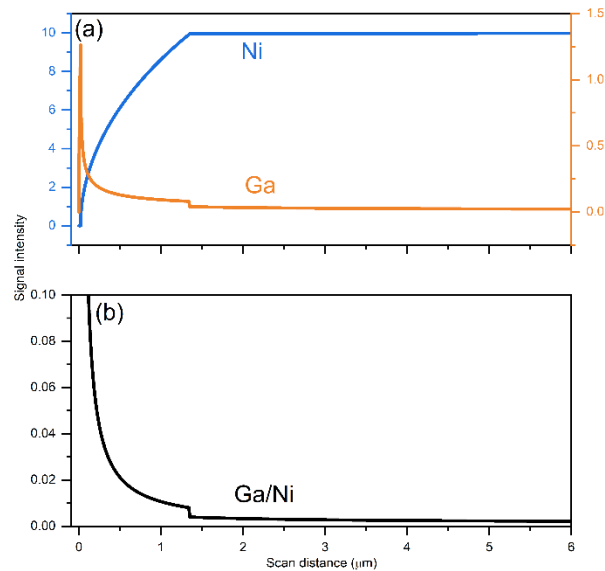

**Fig. S5.** Simulation of EDS line scan signal intensity versus scan distance from the particle edge inward assuming a spherical particle: 20 μm particle outer diameter, 20 nm Ga shell, and a constant beam penetration depth of 10 μm. A Ga-rich shell and Ni-rich core are assumed for the simulation. Simulation data is presented over 6 μm starting from the particle left edge.

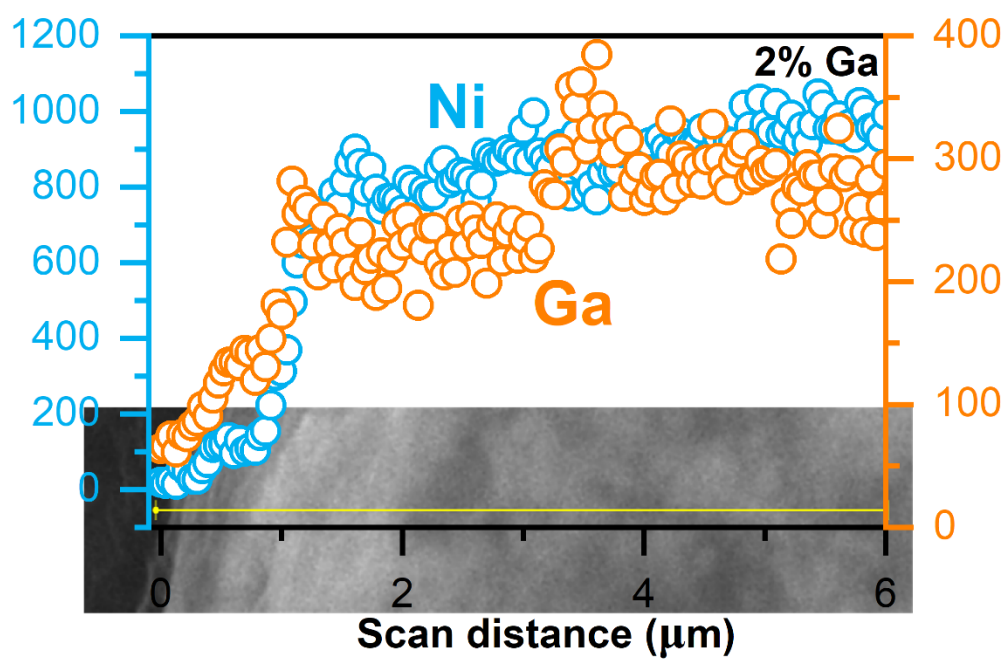

**Fig. S6.** Line scan EDS profile of 2% Ga-LiNiO<sub>2</sub>. The image inset between is the actual SEM image during the line scan.

## Estimation of theoretical specific capacities

**Table S9. Capacity calculation for 0%, 2%, and 5% Ga-LiNiO<sub>2</sub> electrodes.**

| <b>Electrodes</b>        | <b>Theoretical capacity<br/>(mAh·g<sup>-1</sup>)</b> | <b>Experimental initial charge capacity<br/>(mAh·g<sup>-1</sup>) (at 0.1C)</b> |
|--------------------------|------------------------------------------------------|--------------------------------------------------------------------------------|
| 0% Ga-LiNiO <sub>2</sub> | 274.52 (1mol Li)                                     | 221.56 (0.81 mole Li)                                                          |
| 2% Ga-LiNiO <sub>2</sub> | 273.90 (1 mol Li)                                    | 213.33 (0.79 mole Li)                                                          |
| 5% Ga-LiNiO <sub>2</sub> | 268.16 (1 mole Li)                                   | 203.85 (0.77 mole Li)                                                          |

## Electrochemical impedance spectroscopy (EIS) of electrodes in half-cells before and after cycling

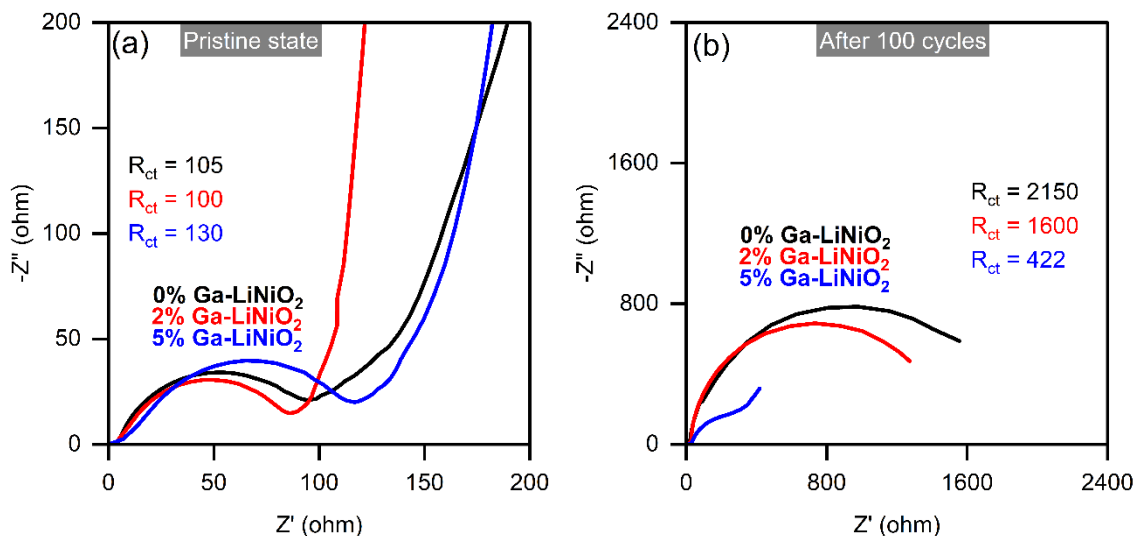

**Fig. S7.** EIS Nyquist plot of (a) as-assembled and (b) cycled 0%, 2%, and 5% Ga-LiNiO<sub>2</sub> half-cells. The estimated charge transfer resistances  $R_{ct}$  are shown in the figures.

The impedance spectra (EIS) of as-assembled half-cells reveal a slightly higher charge transfer resistance ( $R_{ct}$ ) in the 5% Ga-doped cathode (**Fig. S7a**) attributable to the presence of surface  $\alpha$ -LiGaO<sub>2</sub>. However, after 100 cycles, the  $R_{ct}$  for the 0% (~ 2150  $\Omega$ ) and solution-doped 2% (~ 1600  $\Omega$ ) Ga-LiNiO<sub>2</sub> cells increased drastically compared to their 5% Ga-doped counterpart (**Fig. S7b**). This increased resistance is likely from surface reconstruction and the particle pulverization providing higher surface area for excessive growth of resistive cathode-electrolyte interphases (CEI). Conversely, the increase in  $R_{ct}$  for 5% Ga-LiNiO<sub>2</sub> at cycle 100 is markedly lower (~ 422  $\Omega$ ), underscoring the protective effect of the LiGaO<sub>2</sub> coating in mitigating surface degradation and particle breakage responsible for growing impedance.

### Differential capacity analysis (dQ/dV) at C/10

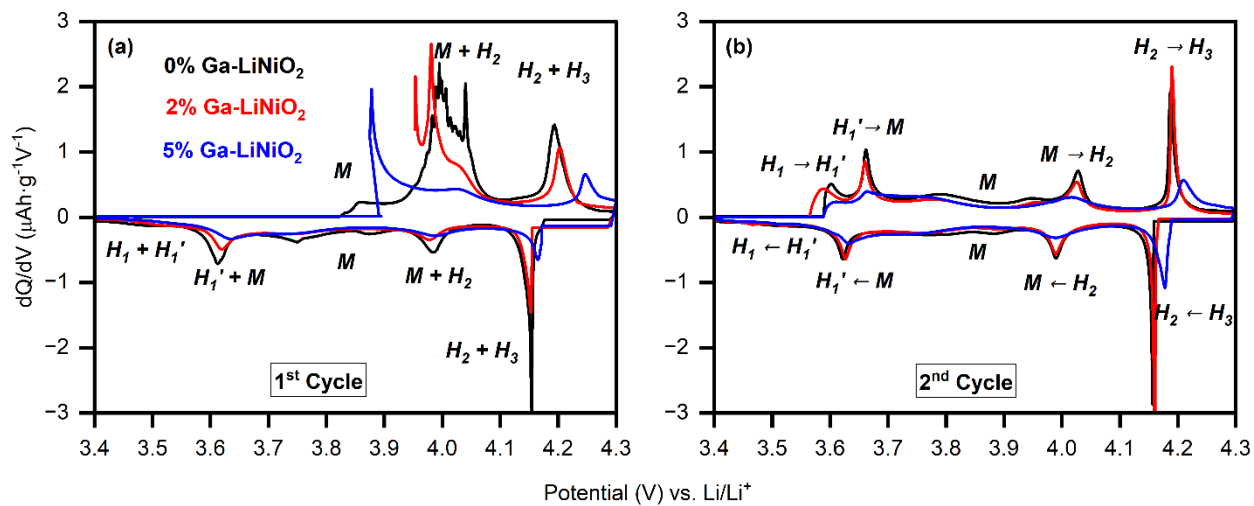

Fig. S8. dQ/dV at C/10 on the 1<sup>st</sup> (a) and 2<sup>nd</sup> (b) cycles of 0%, 2%, and 5% Ga-LiNiO<sub>2</sub>.

### Coulombic Efficiency (CE) profile

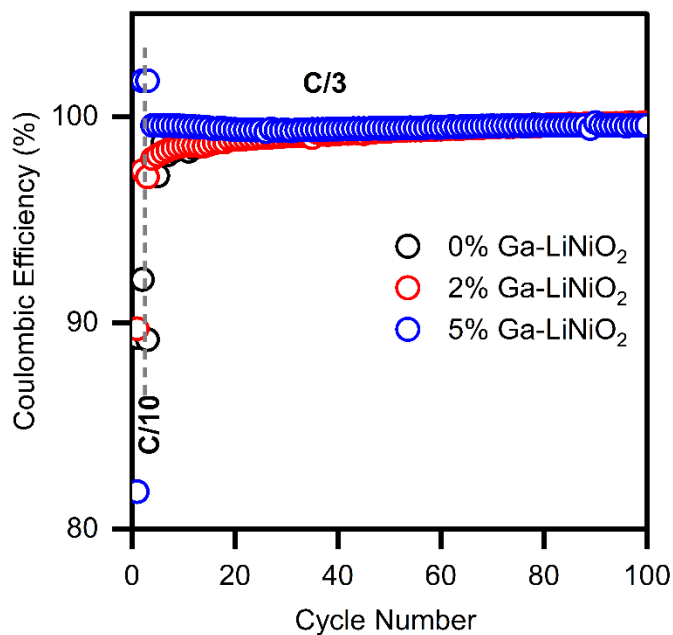

Fig. S9. Coulombic Efficiency profile of 0%, 2%, and 5% Ga-LiNiO<sub>2</sub>.

**Scanning electron microscopy (SEM) imaging of electrodes post 100 cycles**

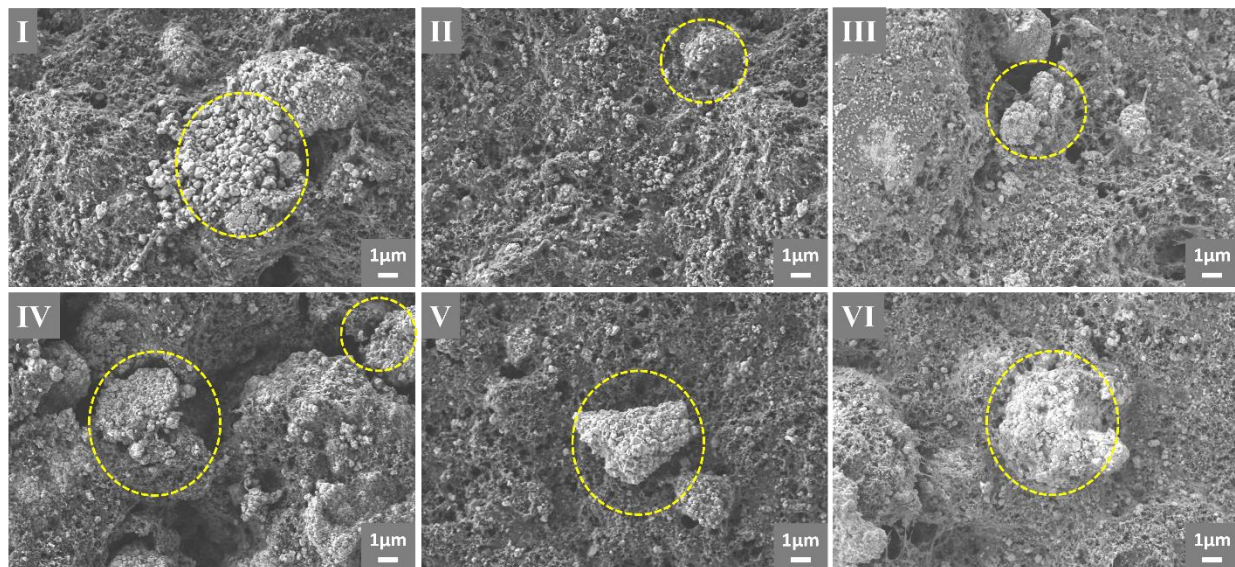

**Fig. S10.** SEM images of 0% Ga-LiNiO<sub>2</sub> electrodes obtained after 100 cycles at different locations showing numerous secondary particles are pulverized to primary nanoparticles.

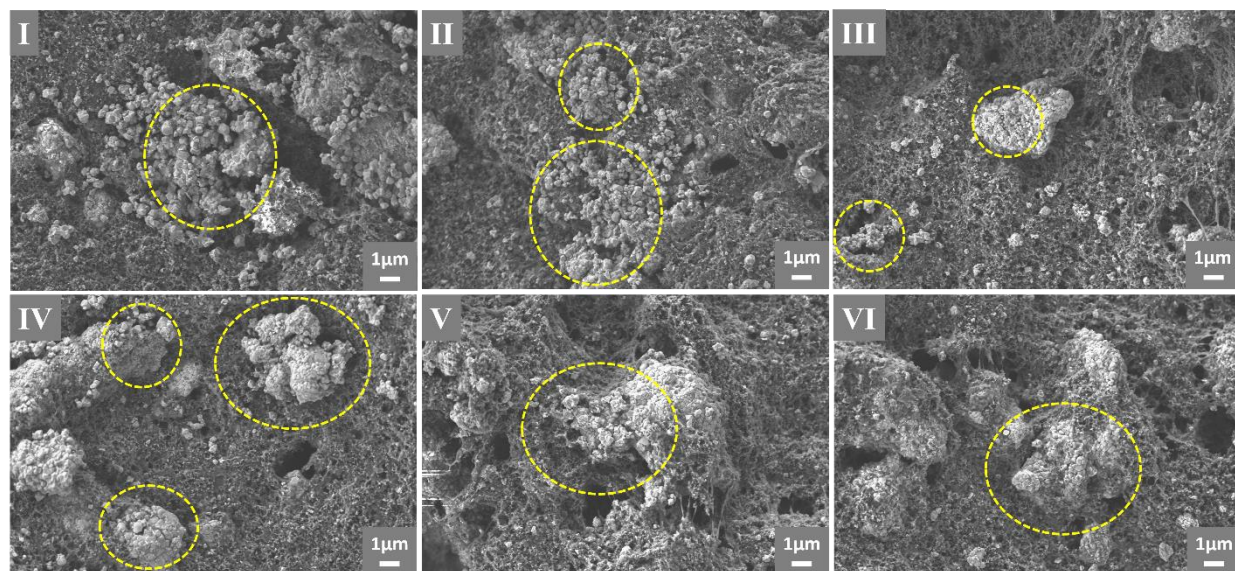

**Fig. S11.** SEM images of 2% Ga-LiNiO<sub>2</sub> electrodes obtained after 100 cycles at different locations also showing numerous secondary particles are pulverized to primary nanoparticles.



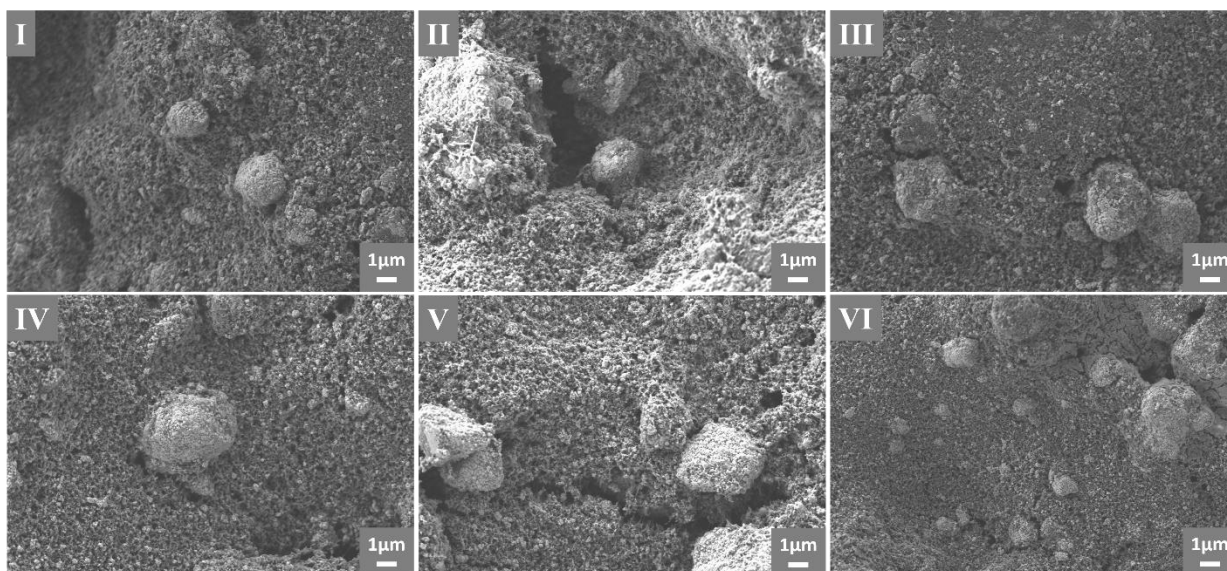

**Fig. S12.** SEM images of 5% Ga-LiNiO<sub>2</sub> electrodes obtained after 100 cycles at different locations showing minimal pulverization of secondary particles.

### HRTEM image of 5% Ga-LiNiO<sub>2</sub> electrodes after 100 cycles

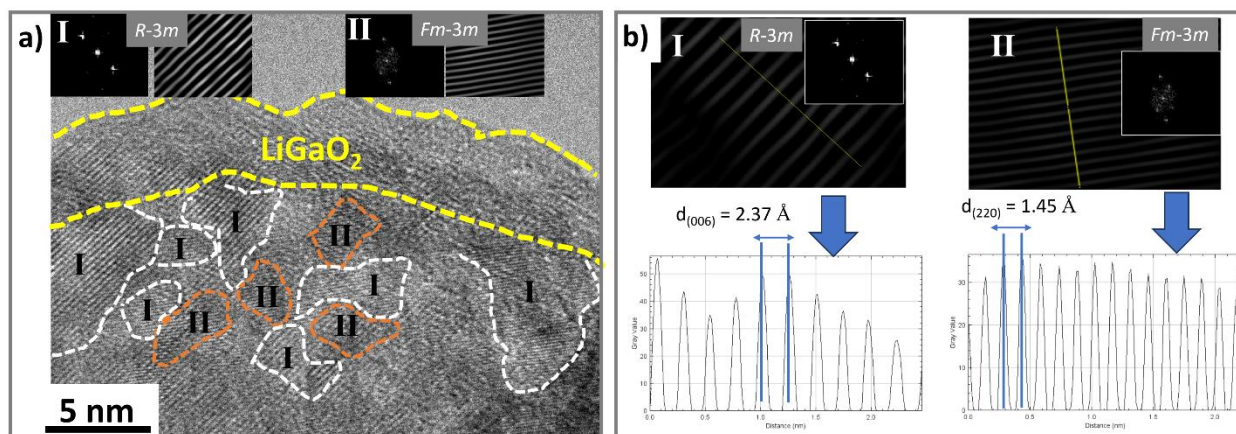

**Fig. S13.** a) HRTEM of 5% Ga-LiNiO<sub>2</sub> obtained after 100 cycles demonstrating  $R\bar{3}m$  and  $Fm\bar{3}m$  distribution at nanoscale near the surface. Region I correspond to  $R\bar{3}m$  symmetry whereas Region II is the  $Fm\bar{3}m$  rock-salt phase from reconstruction. b) d-spacing calculations of region I and II. FFT and corresponding IFFT images of one of the spots are shown inset for clarity.



## REFERENCES

- 1 H. H. Ryu, G. T. Park, C. S. Yoon and Y. K. Sun, *J. Mater. Chem. A*, 2019, **7**, 18580–18588.
- 2 X.-Z. Kong, D.-L. Li, K. Lahtinen, T. Kallio and X.-Q. Ren, *J. Electrochem. Soc.*, 2020, **167**, 140545.
- 3 C. S. Yoon, U. H. Kim, G. T. Park, S. J. Kim, K. H. Kim, J. Kim and Y. K. Sun, *ACS Energy Lett.*, 2018, **3**, 1634–1639.
- 4 J. Li, Y. Zhu, B. Pang and P. Gao, *J. Mater. Sci.*, 2022, **57**, 17722–17734.
- 5 C. S. Yoon, M. J. Choi, D. W. Jun, Q. Zhang, P. Kaghazchi, K. H. Kim and Y. K. Sun, *Chem. Mater.*, 2018, **30**, 1808–1814.
- 6 W. M. Seong and A. Manthiram, *ACS Appl. Mater. Interfaces*, 2020, **12**, 43653–43664.
- 7 G.-X. Huang, R.-H. Wang, X.-Y. Lv, J. Su, Y.-F. Long, Z.-Z. Qin and Y.-X. Wen, *J. Electrochem. Soc.*, 2022, **169**, 040533.
- 8 H. R. Park, *Journal of Industrial and Engineering Chemistry*, 2010, **16**, 698–702.
- 9 J. Cho, T. J. Kim, Y. J. Kim and B. Park, *Electrochem. Solid-State Lett.*, 2001, **4**, A159.
- 10 Y. Li, S. Deng, Y. Chen, J. Gao, J. Zhu, L. Xue, T. Lei, G. Cao, J. Guo and S. Wang, *Electrochim. Acta*, 2019, **300**, 26–35.
- 11 Y. Nishida, K. Nakane and T. Satoh, *J. Power Sources*, 1997, **68**, 561-564.
- 12 D. Kitsche, S. Schweidler, A. Mazilkin, H. Geßwein, F. Fauth, E. Suard, P. Hartmann, T. Brezesinski, J. Janek and M. Bianchini, *Mater. Adv.*, 2020, **1**, 639–647.
- 13 X. Kong, D. Li, E. O. Fedorovskaya, T. Kallio and X. Ren, *Int. J. Energy Res.* 2021, **45**, 10489–10499.
- 14 K. Y. Park, Y. Zhu, C. G. Torres-Castanedo, H. J. Jung, N. S. Luu, O. Kahvecioglu, Y. Yoo, J. W. T. Seo, J. R. Downing, H. D. Lim, M. J. Bedzyk, C. Wolverton and M. C. Hersam, *Adv. Mater.* 2022, **34**, 2106402.
- 15 H. Cao, F. Du, J. Adkins, Q. Zhou, H. Dai, P. Sun, D. Hu and J. Zheng, *Ceram. Int.*, 2020, **46**, 20050–20060.
- 16 S. H. Park, K. S. Park, Y. Kook Sun, K. S. Nahm, Y. S. Lee and M. Yoshio, *Electrochim. Acta*, 2001, **46**, 1215-1222.
- 17 Yang G, Qin X, Wang B, Cai F, Gao J. *Journal of Materials Research*. 2020; **35**(1): 51-57.
- 18 T. Kim, L. K. Ono, Y. Qi, *J. Mater. Chem. A*, 2023, **11**, 221-231.
- 19 L. Wu, X. Tang, X. Chen, Z. Rong, W. Dang, Y. Wang, X. Li, L. Huang, Y. Zhang, *J. Power Sources*, 2020, **445**, 227337.
- 20 J. T. Wolan and G. B. Hoflund, *J. Vac. Sci. Technol. A*, 1998, **16**, 3414.
- 21 <https://www.thermofisher.com/us/en/home/materials-science/learning-center/periodic-table/other-metal/gallium.html>.

Supplementary XRD refinement information clipped from the GSAS-II software. The tables below show improper refinement convergence under various conditions considered. These analyses exclude certain occupancy possibilities.

(a) Refining site occupancy and Uiso value of 2% Ga-LiNiO<sub>2</sub> when assuming Ga occupies only 3a site.

|   | Name | Type | refine | x       | y       | z       | frac    | site sym | mult | I/A | Uiso     |
|---|------|------|--------|---------|---------|---------|---------|----------|------|-----|----------|
| 0 | Ni2  | Ni+3 | FU     | 0.00000 | 0.00000 | 0.50000 | 1.0119  | -3m(100) | 3    | I   | 0.02267  |
| 1 | Ga2  | Ga+3 | FU     | 0.00000 | 0.00000 | 0.00000 | -0.0228 | -3m(100) | 3    | I   | -0.01034 |
| 2 | Li2  | Li+1 | FU     | 0.00000 | 0.00000 | 0.00000 | 1.3487  | -3m(100) | 3    | I   | -0.01034 |
| 3 | O1   | O-2  |        | 0.00000 | 0.00000 | 0.23924 | 1.0000  | 3m(100)  | 6    | I   | 0.02418  |

|   | Name | Type | refine | x       | y       | z       | frac    | site sym | mult | I/A | Uiso    |
|---|------|------|--------|---------|---------|---------|---------|----------|------|-----|---------|
| 0 | Ni1  | Ni+3 | FU     | 0.00000 | 0.00000 | 0.50000 | 0.5824  | -3m(100) | 3    | I   | 0.07930 |
| 1 | Ga1  | Ga+3 | FU     | 0.00000 | 0.00000 | 0.00000 | -0.1995 | -3m(100) | 3    | I   | 0.09034 |
| 2 | Li1  | Li+1 | FU     | 0.00000 | 0.00000 | 0.00000 | 1.1995  | -3m(100) | 3    | I   | 0.09034 |
| 3 | O1   | O-2  | XU     | 0.00000 | 0.00000 | 0.24329 | 1.0000  | 3m(100)  | 6    | I   | 0.00343 |

(b) Refining site occupancy and Uiso value of 2% Ga-LiNiO<sub>2</sub> when assuming Ga occupies only 3b site.

|   | Name | Type | refine | x       | y       | z       | frac   | site sym | mult | I/A | Uiso     |
|---|------|------|--------|---------|---------|---------|--------|----------|------|-----|----------|
| 0 | Ni1  | Ni+3 | U      | 0.00000 | 0.00000 | 0.50000 | 0.9800 | -3m(100) | 3    | I   | 0.48393  |
| 1 | Ga1  | Ga+3 | U      | 0.00000 | 0.00000 | 0.50000 | 0.0200 | -3m(100) | 3    | I   | 0.51607  |
| 2 | Li1  | Li+1 | U      | 0.00000 | 0.00000 | 0.00000 | 1.0000 | -3m(100) | 3    | I   | -2.89599 |
| 3 | O1   | O-2  |        | 0.00000 | 0.00000 | 0.23924 | 1.0000 | 3m(100)  | 6    | I   | 0.02418  |

|   | Name | Type | refine | x       | y       | z       | frac   | site sym | mult | I/A | Uiso     |
|---|------|------|--------|---------|---------|---------|--------|----------|------|-----|----------|
| 0 | Ni1  | Ni+3 | FU     | 0.00000 | 0.00000 | 0.50000 | 0.9524 | -3m(100) | 3    | I   | 0.02330  |
| 1 | Ga1  | Ga+3 | FU     | 0.00000 | 0.00000 | 0.50000 | 0.0476 | -3m(100) | 3    | I   | 0.02330  |
| 2 | Li1  | Li+1 | FU     | 0.00000 | 0.00000 | 0.00000 | 1.0460 | -3m(100) | 3    | I   | -3.66347 |
| 3 | O1   | O-2  |        | 0.00000 | 0.00000 | 0.23924 | 1.0000 | 3m(100)  | 6    | I   | 0.02418  |
